# Supplementary material
Source: HighWire-hosted journal article supplement (https://erj.ersjournals.com/content/58/3/2004233)
Supplement: inline-supplementary-material-2 [file inline-supplementary-material-2.pdf]

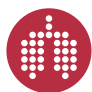

# Triple therapy in uncontrolled asthma: a network meta-analysis of phase III studies

SHAREABLE PDF

Paola Rogliani <sup>1</sup>, Beatrice Ludovica Ritondo <sup>1</sup> and Luigino Calzetta <sup>2</sup>

<sup>1</sup>Unit of Respiratory Medicine, Dept of Experimental Medicine, University of Rome “Tor Vergata”, Rome, Italy. <sup>2</sup>Dept of Medicine and Surgery, Respiratory Disease and Lung Function Unit, University of Parma, Parma, Italy.

Corresponding author: Paola Rogliani ([paola.rogliani@uniroma2.it](mailto:paola.rogliani@uniroma2.it))

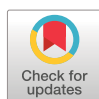

Shareable abstract (@ERSpublications)

**Triple combination therapy by adding either a LAMA to ICS/LABA FDC or escalating ICS on a background of ICS/LABA/LAMA FDC may reduce severe exacerbations and improve lung function; adding a LAMA along with escalating ICS provides incremental effects** <https://bit.ly/39NuNkb>

**Cite this article as:** Rogliani P, Ritondo BL, Calzetta L. Triple therapy in uncontrolled asthma: a network meta-analysis of phase III studies. *Eur Respir J* 2021; 58: 2004233 [DOI: 10.1183/13993003.04233-2020].

This single-page version can be shared freely online.

## Abstract

Conflicting evidence is currently available concerning the impact on asthma exacerbation of triple inhaled corticosteroid (ICS)/long-acting  $\beta_2$ -adrenoceptor agonist (LABA)/long-acting muscarinic receptor antagonist (LAMA) fixed-dose combination (FDC).

Since meta-analyses allow settling controversies of apparently inconsistent results, we performed a network meta-analysis of phase III randomised controlled trials including 9535 patients to assess the effect of ICS/LABA/LAMA combinations in uncontrolled asthma.

Triple combination therapies with an ICS administered at high dose (HD) were more effective ( $p < 0.05$ ) than medium-dose (MD) ICS/LABA/LAMA FDC and both MD and HD ICS/LABA FDCs against moderate to severe exacerbation (relative risk 0.61–0.80) and increasing trough forced expiratory volume in 1 s (from +33 to +114 mL). Triple combination therapies including HD ICS were superior ( $p < 0.05$ ) to MD ICS/LABA/LAMA FDC in preventing severe exacerbation (relative risk 0.46–0.65), but not with respect to moderate exacerbation ( $p > 0.05$ ). Triple combination therapies were equally effective on asthma control, with no safety concerns.

This quantitative synthesis suggests that ICS/LABA/LAMA FDCs are effective and safe in uncontrolled asthma, and that the dose of ICS in the combination represents the discriminating factor to treat patients with a history of moderate or severe exacerbation.

Copyright ©The authors 2021. For reproduction rights and permissions contact [permissions@ersnet.org](mailto:permissions@ersnet.org)

This article has supplementary material available from [erj.ersjournals.com](http://erj.ersjournals.com)

Received: 16 Nov 2020  
Accepted: 13 Jan 2021
